# Supplementary material for: Threats of invasive alien species to Nature’s Contribution to People
Source: Research Square preprint supplement (doi:10.21203/rs.3.rs-2599509/v1), 2023-02-20
Supplement: Supplementary file 1 [file 3199540449604a038cdd50f4.xlsx]

## Sheet: Sources of occurrence
Scientific name	ID	GBIF	DOI	Gallardo et al. (2017)	EASIN (2017)	EASIN (2017)	EASIN (2019)	EASIN (2019) updates	EASIN total	Ascensao et al. (2021)	TOTAL OCCURRENCES	GRIDDED OCCURRENCES
Alopochen aegyptiaca	Aaegy	995927	10.15468/dl.pvn9hq	NA	NA	1720	NA	NA	1720	10177	1007824	10570
Ailanthus altissima	Aalti	83988	10.15468/dl.2uwwf2	14198	NA	NA	7720	NA	7720	NA	105906	9057
Axis axis	Aaxis	2023	10.15468/dl.tg2hfz	NA	NA	NA	NA	NA	0	NA	2023	394
Ambrosia confertiflora	Aconf	1697	10.15468/dl.fcjz3j	NA	NA	NA	NA	NA	0	NA	1697	739
Acridotheres cristatellus	Acris	111186	10.15468/dl.vf6hr5	NA	NA	NA	NA	NA	0	5352	116538	1850
Ameiurus melas	Amela	24317	10.15468/dl.p3e6gv	NA	NA	NA	NA	NA	0	NA	24317	5433
Ameiurus nebulosus	Anebu	40185	10.15468/dl.uprxwc	NA	NA	NA	NA	NA	0	NA	40185	3788
Alternanthera philoxeroides	Aphil	23998	10.15468/dl.snyvst	NA	NA	45	NA	NA	45	NA	24043	1666
Acacia saligna	Asali	7363	10.15468/dl.nkh6zs	NA	NA	NA	491	NA	491	NA	7854	1417
Asclepias syriaca	Asyri	32171	10.15468/dl.qarhu5	NA	NA	773	NA	NA	773	NA	32944	6083
Arthurdendyus triangulatus	Atria	4619	10.15468/dl.536gzb	NA	NA	NA	69	NA	69	NA	4688	512
Acridotheres tristis	Atris	1518910	10.15468/dl.yxu3ky	NA	NA	NA	20	NA	20	65	1518995	14552
Andropogon virginicus	Avirg	7048	10.15468/dl.fn3mrx	NA	NA	NA	11	NA	11	NA	7059	1853
Baccharis halimifolia	Bhali	9897	10.15468/dl.tynnud	3464	431	NA	NA	431	862	NA	14223	2538
Broussonetia papyrifera	Bpapy	17548	10.15468/dl.snj4wx	NA	NA	NA	NA	NA	0	NA	17548	3382
Channa argus	Cargu	4985	10.15468/dl.afu28r	NA	NA	NA	NA	NA	0	NA	4985	286
Castor canadensis	Ccana	18075	10.15468/dl.8p2rjk	NA	NA	NA	NA	NA	0	NA	18075	4901
Cabomba caroliniana	Ccaro	2336	10.15468/dl.wt9p7y	NA	113	NA	NA	NA	113	NA	2449	617
Callosciurus erythraeus	Ceryt	2263	10.15468/dl.9vkjpg	NA	20	NA	NA	23	43	NA	2306	358
Cardiospermum grandiflorum	Cgran	3093	10.15468/dl.7v4sdj	NA	NA	NA	30	NA	30	NA	3123	870
Cortaderia jubata	Cjuba	10145	10.15468/dl.mgkm5a	NA	NA	NA	NA	NA	0	NA	10145	320
Celastrus orbiculatus	Corbi	13648	10.15468/dl.2g783y	NA	NA	NA	NA	NA	0	NA	13648	2426
Cydalima perspectalis	Cpers	50398	10.15468/dl.zjvtky	NA	NA	NA	NA	NA	0	NA	50398	2148
Cortaderia selloana	Csell	23421	10.15468/dl.k6a6q7	5716	NA	NA	NA	NA	0	NA	29137	4886
Cenchrus setaceus	Cseta	10359	10.15468/dl.ydcyjm	NA	NA	NA	NA	NA	0	NA	10359	1402
Corvus splendens	Csple	625541	10.15468/dl.zgcca7	NA	21	NA	NA	NA	21	NA	625562	7048
Ehrharta calycina	Ecaly	10051	10.15468/dl.dx5az7	NA	NA	NA	2	NA	2	NA	10053	899
Eichhornia crassipes	Ecras	20476	10.15468/dl.pw9cn9	4206	168	NA	NA	184	352	NA	25034	4141
Elodea nuttallii	Enutt	80857	10.15468/dl.ykkuht	3349	NA	4811	NA	NA	4811	NA	89017	4079
Fundulus heteroclitus	Fhete	8359	10.15468/dl.kqkngm	NA	NA	NA	NA	NA	0	NA	8359	526
Faxonius immunis	Fimmu	678	10.15468/dl.2x7p7w	NA	NA	NA	NA	NA	0	NA	678	398
Faxonius limosus	Flimo	16622	10.15468/dl.4xuz34	NA	NA	NA	NA	NA	0	NA	16622	2263
Faxonius rusticus	Frust	3916	10.15468/dl.jbzq2b	NA	NA	NA	NA	NA	0	NA	3916	991
Fallopia spp	Fspp	320491	10.15468/dl.xejp2w	10723	NA	NA	NA	NA	0	NA	331214	14320
Faxonius virilis	Fviri	3194	10.15468/dl.m5qtpq	NA	NA	NA	NA	NA	0	NA	3194	1307
Gambusia affinis	Gaffi	35468	10.15468/dl.sj88je	NA	NA	NA	NA	NA	0	NA	35468	5601
Gymnocoronis spilanthoides	Gspil	612	10.15468/dl.65nrq8	NA	NA	NA	5	NA	5	NA	617	222
Gunnera tinctoria	Gtinc	3201	10.15468/dl.jywa8p	NA	NA	273	NA	NA	273	NA	3474	1029
Herpestes javanicus	Hjava	7901	10.15468/dl.f9gpws	NA	40	NA	NA	NA	40	NA	7941	310
Heracleum mantegazzianum	Hmant	108424	10.15468/dl.mnn3ad	5633	NA	10377	NA	NA	10377	NA	124434	7015
Heracleum persicum	Hpers	276	10.15468/dl.hp8nhr	NA	142	NA	NA	NA	142	NA	418	193
Hydrocotyle ranunculoides	Hranu	9588	10.15468/dl.zeuee8	NA	1048	NA	NA	1050	2098	NA	11686	1526
Humulus scandens	Hscan	4486	10.15468/dl.bpvt9g	NA	NA	NA	97	NA	97	NA	4583	1375
Hakea sericea	Hseri	7637	10.15468/dl.gthrj4	NA	NA	NA	NA	NA	0	NA	7637	664
Heracleum sosnowskyi	Hsosn	16215	10.15468/dl.hwdsmt	NA	3263	NA	NA	NA	3263	NA	19478	2920
Impatiens glandulifera	Iglan	329417	10.15468/dl.9ded5w	4899	NA	16531	NA	NA	16531	NA	350847	12159
Koenigia polystachya	Kpoly	4019	10.15468/dl.6xet5d	NA	NA	NA	NA	NA	0	NA	4019	903
Lysichiton americanus	Lamer	11749	10.15468/dl.b8ucw9	NA	1271	NA	NA	NA	1271	NA	13020	1690
Lithobates catesbeianus	Lcate	51264	10.15468/dl.5suy5h	6209	149	NA	NA	133	282	3	57758	7366
Lespedeza cuneata	Lcune	7237	10.15468/dl.hxpcs4	NA	NA	NA	NA	NA	0	NA	7237	2597
Limnoperna fortunei	Lfort	124	10.15468/dl.bkj2kt	NA	NA	NA	NA	NA	0	NA	124	71
Lampropeltis getula	Lgetu	6226	10.15468/dl.cd8vw6	NA	NA	NA	NA	NA	0	NA	6226	2002
Lepomis gibbosus	Lgibb	76554	10.15468/dl.vswx5e	NA	NA	NA	2168	NA	2168	NA	78722	6503
Ludwigia grandiflora	Lgran	12530	10.15468/dl.yyrryc	1734	877	NA	NA	901	1778	NA	16042	1561
Lygodium japonicum	Ljapo	8340	10.15468/dl.a7bsxd	NA	NA	NA	NA	NA	0	NA	8340	2183
Lagarosiphon major	Lmajo	3504	10.15468/dl.97ggw6	NA	2227	NA	NA	2250	4477	NA	7981	1153
Ludwigia peploides	Lpepl	13613	10.15468/dl.dtaj9y	NA	385	NA	NA	408	793	NA	14406	2798
Morone americana	Mamer	10778	10.15468/dl.s8japq	NA	NA	NA	NA	NA	0	NA	10778	904
Misgurnus anguillicaudatus	Mangu	16088	10.15468/dl.ndbqbz	NA	NA	NA	NA	NA	0	NA	16088	838
Myriophyllum aquaticum	Maqua	11899	10.15468/dl.8ymex3	NA	2257	NA	NA	2281	4538	NA	16437	3128
Myocastor coypus	Mcoyp	56336	10.15468/dl.svbygj	7050	3366	NA	NA	2723	6089	41	69516	5277
Myriophyllum heterophyllum	Mhete	1615	10.15468/dl.t6ramx	NA	NA	111	NA	NA	111	NA	1726	653
Muntiacus reevesi	Mreev	19007	10.15468/dl.4ae99h	1665	3067	NA	NA	NA	3067	NA	23739	948
Microstegium vimineum	Mvimi	6585	10.15468/dl.s8ty7f	NA	NA	NA	NA	NA	0	NA	6585	1815
Nasua nasua	Nnasu	2498	10.15468/dl.e2wqth	NA	9	NA	NA	NA	9	NA	2507	618
Nyctereutes procyonoides	Nproc	23982	10.15468/dl.vk2qa3	1772	NA	NA	5880	NA	5880	NA	31634	2563
Oxyura jamaicensis	Ojama	1760414	10.15468/dl.bpyysq	7499	660	NA	NA	742	1402	154	1769469	19571
Ondatra zibethicus	Ozibe	557413	10.15468/dl.484ad2	3152	NA	6155	NA	NA	6155	7	566727	8732
Phytolacca americana	Pamer	125902	10.15468/dl.ywsnvz	NA	NA	NA	NA	NA	0	NA	125902	13421
Pycnonotus cafer	Pcafe	505624	10.15468/dl.49pg6e	NA	NA	NA	NA	NA	0	13	505637	6918
Procambarus clarkii	Pclar	14570	10.15468/dl.pdxamh	886	2687	NA	NA	3044	5731	NA	21187	3603
Perccottus glenii	Pglen	832	10.15468/dl.mymngn	NA	251	NA	NA	NA	251	NA	1083	473
Parthenium hysterophorus	Physt	11078	10.15468/dl.eue9xc	NA	1	NA	NA	NA	1	NA	11079	3520
Prosopis juliflora	Pjuli	3740	10.15468/dl.kc3hrr	NA	NA	NA	5	NA	5	NA	3745	969
Pacifastacus leniusculus	Pleni	33126	10.15468/dl.cdycyg	NA	4801	NA	NA	5259	10060	NA	43186	3895
Procyon lotor	Ploto	50465	10.15468/dl.gzuftb	8420	6636	NA	NA	6712	13348	20	72253	10788
Platydemus manokwari	Pmano	410	10.15468/dl.7x54ct	NA	NA	NA	NA	NA	0	NA	410	198
Pueraria montana var lobata	Pmont	4144	10.15468/dl.vffnjw	917	20	NA	NA	24	44	NA	5105	1424
Pseudorasbora parva	Pparv	33704	10.15468/dl.drxgff	1358	2898	NA	NA	3031	5929	NA	40991	3084
Persicaria perfoliata	Pperf	4568	10.15468/dl.mhsjgm	NA	NA	NA	NA	NA	0	NA	4568	1249
Pistia stratiotes	Pstra	13379	10.15468/dl.r7gz22	3492	NA	NA	NA	NA	0	NA	16871	3217
Sciurus carolinensis	Scaro	227473	10.15468/dl.t7wryw	5166	5301	NA	NA	5253	10554	NA	243193	6263
Solenopsis geminata	Sgemi	10119	10.15468/dl.x5ert9	NA	NA	NA	NA	NA	0	NA	10119	887
Solenopsis japonica	Sjapo	14	10.15468/dl.6rzwk6	NA	NA	NA	NA	NA	0	NA	14	6
Salvinia molesta	Smole	3353	10.15468/dl.gsjw9f	918	NA	NA	24	NA	24	NA	4295	763
Sciurus niger	Snige	38854	10.15468/dl.krz7nz	NA	1	NA	NA	NA	1	NA	38855	3363
Solenopsis richteri	Srich	202	10.15468/dl.z7qjgb	NA	NA	NA	NA	NA	0	NA	202	71
Threskiornis aethiopicus	Taeth	258381	10.15468/dl.jy4nq9	2832	320	NA	NA	1217	1537	578	263328	5795
Trachemys scripta	Tscri	70138	10.15468/dl.4g5asd	1503	1966	NA	NA	1933	3899	916	76456	8761
Triadica sebifera	Tsebi	8941	10.15468/dl.x38dxz	NA	NA	NA	NA	NA	0	NA	8941	1850
Tamias sibiricus	Tsibi	11844	10.15468/dl.n4yaq5	636	146	NA	NA	112	258	NA	12738	980
Vespa mandarinia	Vmand	2729	10.15468/dl.5rs45t	NA	NA	NA	NA	NA	0	NA	2729	513
Vespa velutina	Vvelu	38329	10.15468/dl.x9vrpw	NA	2882	NA	NA	2908	5790	NA	44119	2436
Wasmannia auropunctata	Wauro	9831	10.15468/dl.jpcxjc	NA	NA	NA	NA	NA	0	NA	9831	685
Xenopus laevis	Xlaev	4949	10.15468/dl.3b5bgs	NA	NA	NA	NA	NA	0	21	4970	516

## Sheet: Field descriptions
Scientific name	Scientific name of the species
ID	4-letter identification used in analyses
GBIF	Number of occurrences extracted from GBIF
DOI	Identification of GBIF downloads
Gallardo et al. (2017)	Number of occurrences extracted from scientific publication
EASIN (2016)	Occurrences obtained from EASIN (https://easin.jrc.ec.europa.eu/easin) corresponding to the year 2016.
EASIN (2017)	Occurrences obtained from EASIN (https://easin.jrc.ec.europa.eu/easin) corresponding to the year 2017.
EASIN (2019)	Occurrences obtained from EASIN (https://easin.jrc.ec.europa.eu/easin) corresponding to the year 2019a.
EASIN (2019) updates	Occurrences obtained from EASIN (https://easin.jrc.ec.europa.eu/easin) corresponding to the year 2019b.
EASIN total	Total number of occurrences obtained from EASIN considering all updates to baseline distribution maps.
Ascensao et al. (2021)	Number of occurrences extracted from scientific publication
TOTAL OCCURRENCES	Total number of occurrences obtained for each species
GRIDDED OCCURRENCES	Total number of occurrences used to calibrate models after data cleaning and filtering to a 10-arcminute resolution
