# Supplementary material for: Threats of invasive alien species to Nature’s Contribution to People
Source: Research Square preprint supplement (doi:10.21203/rs.3.rs-2599509/v1), 2023-02-20
Supplement: Supplementary file 3 [file 7440edd8189f9af9204df802.xlsx]

## Sheet: Potential impacts
NCP	ID	L1	M1	H1 (SAFE)	L2	M2	H2	L3 (CRITICAL)	M3	H3 (HOTSPOT)		%SAFE	%CRITICAL	%HOTSPOT	%H2	%M3+M2+H2							NCP	L1	M1	SAFE	L2	M2	H2	CRITICAL	M3	HOTSPOT
NCP1	Asali	2424	24858	4057	1450	7135	18	191	594	3		10	0.5	0	0	19.0204							Habitat maintenance (N= 57)	99088	963700	195842	108499	736433	35085	24118	157326	1519
NCP1	Aalti	162	7627	3451	1882	13582	595	2021	11378	32		8.5	5	0.1	1.5	62.7425							Water quality (N= 31)	347325	262804	8646	165126	336054	18402	11697	50933	4851
NCP1	Aphil	1787	22078	4027	2220	10200	51	58	309	0		9.9	0.1	0	0.1	25.9268							Soil retention (N= 8)	229456	635821	292983	151560	493027	108219	30795	119958	17403
NCP1	Aconf	1394	20566	4017	2596	11876	61	75	145	0		9.9	0.2	0	0.1	29.6636							Hazards regulation (N= 13)	32764	139681	62731	54072	135718	35494	17151	36835	5892
NCP1	Amela	1313	19894	3987	2135	10489	91	617	2204	0		9.8	1.5	0	0.2	31.3872							Food provision (N= 41)	162145	486861	145831	135218	430270	149333	13704	58177	30622
NCP1	Anebu	1374	18326	3906	2685	14109	172	6	152	0		9.6	0	0	0.4	35.4358							Material provision (N= 14)	72573	168826	54543	20639	121659	42767	1316	7771	2538
NCP1	Avirg	2550	21933	4020	1496	10645	58	19	9	0		9.9	0	0	0.1	26.3							Human experiences (N= 70)	256596	901191	379946	249969	652753	158127	53365	127316	22557
NCP1	Atria	3040	21030	1812	1025	11555	2266	0	2	0		4.4	0	0	5.6	33.9381							ALL NCP	1199947	3558884	1140522	885083	2905914	547427	152146	558316	85382
NCP1	Asyri	1892	17252	3795	2087	14463	282	86	872	1		9.3	0.2	0	0.7	38.3427
NCP1	Bhali	2539	25841	3943	1416	6320	134	110	426	1		9.7	0.3	0	0.3	16.8917
NCP1	Bpapy	523	12802	3600	2493	15354	464	1049	4431	14		8.8	2.6	0	1.1	49.7152
NCP1	Ccaro	732	14133	3995	3296	18410	83	37	44	0		9.8	0.1	0	0.2	45.5119
NCP1	Cgran	2911	22005	3889	1153	10572	189	1	10	0		9.5	0	0	0.5	26.4449
NCP1	Ccana	707	7292	1505	2690	22230	2528	668	3065	45		3.7	1.6	0.1	6.2	68.3108
NCP1	Corbi	3182	26391	4007	881	6150	71	2	46	0		9.8	0	0	0.2	15.3867
NCP1	Cseta	107	8255	3831	3568	22800	242	390	1532	5		9.4	1	0	0.6	60.3339
NCP1	Csell	780	12231	3508	1885	13500	540	1400	6856	30		8.6	3.4	0.1	1.3	51.3037
NCP1	Cpers	1354	12757	3500	2087	15526	555	624	4304	23		8.6	1.5	0.1	1.4	50.0491
NCP1	Ecaly	2233	25913	4056	1817	6550	22	15	124	0		10	0	0	0.1	16.44
NCP1	Ecras	766	13602	3959	3078	18505	117	221	480	2		9.7	0.5	0	0.3	46.8991
NCP1	Enutt	1704	12972	3517	1676	14481	541	685	5134	20		8.6	1.7	0	1.3	49.4869
NCP1	Fspp	1453	6353	2836	1412	12292	998	1200	13942	244		7	2.9	0.6	2.5	66.8598
NCP1	Flimo	1925	17468	3804	1523	11088	269	617	4031	5		9.3	1.5	0	0.7	37.7805
NCP1	Frust	1513	13197	1512	2552	19389	2566	0	1	0		3.7	0	0	6.3	53.9062
NCP1	Gtinc	3140	25973	3997	886	5816	68	39	798	13		9.8	0.1	0	0.2	16.4056
NCP1	Gspil	1388	19780	4034	2677	12801	44	0	6	0		9.9	0	0	0.1	31.5517
NCP1	Hseri	2819	20290	3989	1241	11916	89	5	381	0		9.8	0	0	0.2	30.41
NCP1	Hmant	2549	11812	2128	733	12377	1852	783	8398	98		5.2	1.9	0.2	4.5	55.5536
NCP1	Hpers	2662	14732	981	1402	17276	3084	1	579	13		2.4	0	0	7.6	51.4093
NCP1	Hsosn	3301	19324	3096	424	7722	956	340	5541	26		7.6	0.8	0.1	2.3	34.9104
NCP1	Hscan	2071	24687	4054	1963	7855	24	31	45	0		10	0.1	0	0.1	19.4549
NCP1	Hranu	865	16949	3975	2898	14311	96	302	1327	7		9.8	0.7	0	0.2	38.63
NCP1	Iglan	1726	7106	1722	978	8373	1753	1361	17108	603		4.2	3.3	1.5	4.3	66.8647
NCP1	Kpoly	3029	19277	3464	779	11621	599	257	1689	15		8.5	0.6	0	1.5	34.1493
NCP1	Lgibb	1124	16041	3890	1993	12225	183	948	4321	5		9.6	2.3	0	0.4	41.0729
NCP1	Lcune	1664	14306	3685	2199	17208	381	202	1073	12		9	0.5	0	0.9	45.8188
NCP1	Lfort	0	0	0	4065	32587	4078	0	0	0		0	0	0	10	90.0196
NCP1	Lgran	1429	18973	4000	1936	10309	75	700	3305	3		9.8	1.7	0	0.2	33.6091
NCP1	Lpepl	677	17372	3986	2834	13510	89	554	1705	3		9.8	1.4	0	0.2	37.5743
NCP1	Ljapo	3459	29458	3862	603	3067	216	3	62	0		9.5	0	0	0.5	8.21262
NCP1	Lamer	2950	17245	3732	1080	14604	330	35	738	16		9.2	0.1	0	0.8	38.4778
NCP1	Mvimi	2114	17977	3689	1929	14272	387	22	338	2		9.1	0.1	0	1	36.8205
NCP1	Mcoyp	642	10050	3634	1999	13847	402	1424	8690	42		8.9	3.5	0.1	1	56.3197
NCP1	Maqua	1280	16674	3926	2099	11963	130	686	3950	22		9.6	1.7	0.1	0.3	39.3887
NCP1	Mhete	1557	10347	1654	2392	21845	2424	116	395	0		4.1	0.3	0	6	60.5549
NCP1	Ozibe	645	3538	1708	2209	17430	2336	1211	11619	34		4.2	3	0.1	5.7	77.0562
NCP1	Pleni	2327	10052	3293	1412	17521	676	326	5014	109		8.1	0.8	0.3	1.7	56.9875
NCP1	Physt	3138	29079	4064	927	3506	14	0	2	0		10	0	0	0	8.64719
NCP1	Pperf	2618	23302	3810	1447	9275	268	0	10	0		9.4	0	0	0.7	23.4545
NCP1	Pamer	284	8619	3485	2182	14131	562	1599	9837	31		8.6	3.9	0.1	1.4	60.2259
NCP1	Pstra	644	9878	3809	3245	22125	266	176	584	3		9.4	0.4	0	0.7	56.4081
NCP1	Pclar	881	15121	3725	1267	10195	319	1917	7271	34		9.1	4.7	0.1	0.8	43.6656
NCP1	Pjuli	2426	26579	4055	1638	6007	23	1	1	0		10	0	0	0.1	14.8073
NCP1	Pmont	2647	26027	3884	1416	6539	194	2	21	0		9.5	0	0	0.5	16.5824
NCP1	Smole	1811	19189	4016	2231	13040	62	23	358	0		9.9	0.1	0	0.2	33.0469
NCP1	Snige	841	17590	4004	2450	13299	74	774	1698	0		9.8	1.9	0	0.2	37.0022
NCP1	Tsebi	2015	21577	3957	1862	10639	118	188	371	3		9.7	0.5	0	0.3	27.3214
NCP6	Bpapy	1508	10304	5132	4954	10677	2348	1537	3037	529		12.8	3.8	1.3	5.9	40.1289
NCP6	Ccana	1847	5384	1854	5215	16590	5641	937	2044	514		4.6	2.3	1.3	14.1	60.6481
NCP6	Ecras	1830	10885	5420	5975	12844	2537	194	289	52		13.5	0.5	0.1	6.3	39.1496
NCP6	Enutt	2829	9323	4912	3016	10375	2397	2154	4320	700		12.3	5.4	1.7	6	42.7022
NCP6	Flimo	3780	13376	5729	2926	7821	1826	1293	2821	454		14.3	3.2	1.1	4.6	31.1498
NCP6	Hscan	4311	18473	7552	3653	5512	457	35	33	0		18.9	0.1	0	1.1	14.9953
NCP6	Hranu	2086	13224	5797	4811	9584	2069	1102	1210	143		14.5	2.8	0.4	5.2	32.1366
NCP6	Lgran	3202	14757	6020	3681	6872	1680	1116	2389	309		15	2.8	0.8	4.2	27.3347
NCP6	Mcoyp	1529	7677	4777	3553	10166	2108	2917	6175	1124		11.9	7.3	2.8	5.3	46.0925
NCP6	Mhete	2789	7441	2629	5049	16279	5359	161	298	21		6.6	0.4	0.1	13.4	54.8044
NCP6	Ozibe	1159	2630	1854	3796	12511	5151	3044	8877	1004		4.6	7.6	2.5	12.9	66.3044
NCP6	Pclar	2185	11788	5182	3172	7109	1865	2642	5121	962		12.9	6.6	2.4	4.7	35.2146
NCP6	Smole	3709	14419	5873	4271	9378	2056	19	221	80		14.7	0	0.2	5.1	29.1186
NCP7	Aaegy	10417	4360	23	5822	11908	565	669	4693	441		0.1	1.7	1.1	1.5	44.1308
NCP7	Aphil	14419	13046	356	2388	7668	664	101	247	9		0.9	0.3	0	1.7	22.0551
NCP7	Amela	13577	11195	622	3115	7984	242	216	1782	165		1.6	0.6	0.4	0.6	25.7288
NCP7	Anebu	12704	9489	541	4112	11406	488	92	66	0		1.4	0.2	0	1.3	30.7471
NCP7	Ccaro	12616	6804	144	4279	14107	882	13	50	3		0.4	0	0	2.3	38.6627
NCP7	Ccana	4109	3569	284	11240	15232	717	1559	2160	28		0.7	4	0.1	1.8	46.5551
NCP7	Csell	9668	6571	157	5498	9247	429	1742	5143	443		0.4	4.5	1.1	1.1	38.0971
NCP7	Ecras	11632	6923	180	5097	13560	835	179	478	14		0.5	0.5	0	2.1	38.2359
NCP7	Enutt	10376	7953	98	6143	9194	423	389	3814	508		0.3	1	1.3	1.1	34.5288
NCP7	Fimmu	8619	10953	715	8289	10008	314	0	0	0		1.8	0	0	0.8	26.5361
NCP7	Gaffi	15709	16003	768	1188	4921	261	11	37	0		2	0	0	0.7	13.4171
NCP7	Gspil	14420	10723	173	2488	10232	856	0	6	0		0.4	0	0	2.2	28.5207
NCP7	Hranu	13157	8754	187	3710	11407	618	41	800	224		0.5	0.1	0.6	1.6	32.9708
NCP7	Kpoly	12183	12783	281	4480	6664	498	245	1514	250		0.7	0.6	0.6	1.3	22.3045
NCP7	Lmajo	14233	13449	338	2590	6447	487	85	1065	204		0.9	0.2	0.5	1.3	20.564
NCP7	Lgibb	12028	9273	384	4318	8652	385	562	3036	260		1	1.4	0.7	1	31.0376
NCP7	Lfort	0	0	0	16908	20961	1029	0	0	0		0	0	0	2.6	56.5325
NCP7	Lcate	13457	11141	690	3436	9805	339	15	15	0		1.8	0	0	0.9	26.117
NCP7	Lgran	13511	10954	278	3035	7942	498	362	2065	253		0.7	0.9	0.7	1.3	27.0065
NCP7	Lpepl	13220	9071	292	3400	10421	583	288	1469	154		0.8	0.7	0.4	1.5	32.0659
NCP7	Mangu	14004	10545	389	2873	10398	638	31	18	2		1	0.1	0	1.6	28.4179
NCP7	Maqua	12067	9433	236	4385	8795	364	456	2733	429		0.6	1.2	1.1	0.9	30.5723
NCP7	Mhete	6975	6702	85	9914	14097	919	19	162	25		0.2	0	0.1	2.4	39.02
NCP7	Ozibe	3631	2509	14	12025	10229	328	1252	8223	687		0	3.2	1.8	0.8	48.2801
NCP7	Pglen	11594	7506	246	5283	12586	748	31	869	35		0.6	0.1	0.1	1.9	36.5134
NCP7	Pstra	10771	4142	47	6114	16676	951	23	143	31		0.1	0.1	0.1	2.4	45.6836
NCP7	Pclar	11185	8189	307	3334	7168	492	2389	5604	230		0.8	6.1	0.6	1.3	34.0994
NCP7	Smole	13562	11236	192	3244	9472	803	102	253	34		0.5	0.3	0.1	2.1	27.0657
NCP7	Tscri	9382	2276	9	6852	14595	601	674	4090	419		0	1.7	1.1	1.5	49.581
NCP7	Tsebi	13176	12954	570	3583	7610	456	149	397	3		1.5	0.4	0	1.2	21.7569
NCP7	Xlaev	10923	4298	40	5983	16662	989	2	1	0		0.1	0	0	2.5	45.3802
NCP8	Asali	6945	21704	9342	2371	6823	365	261	515	28		19.3	0.5	0.1	0.8	15.9304
NCP8	Aalti	2060	6387	6588	4357	12456	2145	3160	10199	1002		13.6	6.5	2.1	4.4	51.2884
NCP8	Avirg	6916	18941	8218	2642	10093	1515	19	8	2		17	0	0	3.1	24.0228
NCP8	Atria	6965	18408	4549	2598	10292	5156	14	342	30		9.4	0	0.1	10.7	32.655
NCP8	Aaxis	5919	19082	9026	3658	9960	709	0	0	0		18.7	0	0	1.5	22.0644
NCP8	Bhali	7200	22808	9201	2174	5903	491	203	331	43		19	0.4	0.1	1	13.9078
NCP8	Bpapy	3103	10955	7299	5022	14332	2056	1452	3755	380		15.1	3	0.8	4.3	41.6574
NCP8	Cgran	7277	18996	7962	2300	10036	1772	0	10	1		16.5	0	0	3.7	24.4406
NCP8	Corbi	7903	22307	8746	1670	6679	982	4	56	7		18.1	0	0	2	15.9594
NCP8	Cseta	1901	6938	7229	7187	20692	2456	489	1412	50		15	1	0.1	5.1	50.7921
NCP8	Csell	3754	9143	7102	3522	13080	2111	2301	6819	522		14.7	4.8	1.1	4.4	45.5185
NCP8	Cpers	4261	10271	7085	4090	14838	2173	1226	3933	477		14.7	2.5	1	4.5	43.3139
NCP8	Ecaly	6587	22340	9390	2963	6595	337	27	107	8		19.4	0.1	0	0.7	14.5572
NCP8	Ecras	3341	11852	7645	5894	16830	2038	342	360	52		15.8	0.7	0.1	4.2	39.7651
NCP8	Fspp	3290	5258	3543	3789	9938	3476	2498	13846	2716		7.3	5.2	5.6	7.2	56.3759
NCP8	Fimmu	4662	18084	4333	4915	10958	5402	0	0	0		9	0	0	11.2	33.8338
NCP8	Flimo	6245	15150	7987	2314	10394	1532	1018	3498	216		16.5	2.1	0.4	3.2	31.8981
NCP8	Frust	4299	13983	3813	5278	15058	5922	0	1	0		7.9	0	0	12.2	43.3904
NCP8	Gtinc	7725	21207	9082	1685	6052	590	167	1783	63		18.8	0.3	0.1	1.2	17.4236
NCP8	Hseri	7192	17140	8495	2374	11591	1174	11	311	66		17.6	0	0.1	2.4	27.0422
NCP8	Hmant	5772	10627	2747	2273	10112	5214	1532	8303	1774		5.7	3.2	3.7	10.8	48.8667
NCP8	Hpers	5414	13100	2233	4162	15580	7265	1	362	237		4.6	0	0.5	15	47.994
NCP8	Hsosn	7256	18221	5401	1294	6517	3677	1027	4304	657		11.2	2.1	1.4	7.6	29.983
NCP8	Hscan	5530	21979	9005	4001	7009	726	46	54	4		18.6	0.1	0	1.5	16.1083
NCP8	Iglan	3939	6685	1731	2778	7130	3767	2860	15227	4237		3.6	5.9	8.8	7.8	54.0266
NCP8	Kpoly	7132	15167	6918	1941	10976	2709	504	2899	108		14.3	1	0.2	5.6	34.2971
NCP8	Lmajo	6609	17991	8630	2444	9162	1056	524	1889	49		17.8	1.1	0.1	2.2	25.0383
NCP8	Lcune	4487	10945	6755	4793	16651	2769	297	1446	211		14	0.6	0.4	5.7	43.1526
NCP8	Mvimi	5596	13813	7443	3945	14870	2176	36	359	116		15.4	0.1	0.2	4.5	35.995
NCP8	Mcoyp	3465	8103	7097	3841	13070	1858	2271	7869	780		14.7	4.7	1.6	3.8	47.146
NCP8	Nnasu	7212	19338	8196	2365	9704	1539	0	0	0		16.9	0	0	3.2	23.2514
NCP8	Ozibe	2338	3911	1638	4698	15013	7130	2541	10118	967		3.4	5.3	2	14.7	66.7184
NCP8	Pleni	6175	8742	4459	2759	15594	4040	643	4706	1236		9.2	1.3	2.6	8.4	50.3371
NCP8	Physt	8211	25937	9467	1365	3104	268	1	1	0		19.6	0	0	0.6	6.97564
NCP8	Pamer	2382	8056	6834	4568	12379	1950	2627	8607	951		14.1	5.4	2	4	47.4335
NCP8	Pstra	2900	8830	6705	6393	19719	3017	284	493	13		13.9	0.6	0	6.2	48.0395
NCP8	Pmano	9240	26330	9464	337	2712	271	0	0	0		19.6	0	0	0.6	6.16909
NCP8	Pjuli	7034	23740	9494	2542	5301	241	1	1	0		19.6	0	0	0.5	11.4634
NCP8	Pmont	6878	22615	8563	2697	6419	1157	2	8	15		17.7	0	0	2.4	15.6843
NCP8	Smole	5753	15525	8387	3772	13157	1305	52	360	43		17.3	0.1	0.1	2.7	30.6531
NCP8	Srich	6	140	17	9571	28878	9718	0	24	0		0	0	0	20.1	79.8693
NCP8	Tscri	2197	6063	6622	5292	17640	2789	2088	5339	324		13.7	4.3	0.7	5.8	53.2903
NCP8	Tsebi	6385	19009	8542	2926	9730	1175	266	303	18		17.7	0.6	0	2.4	23.1791
NCP12	Acris	5707	19442	5945	1876	4330	2001	4	16	0		15.1	0	0	5.1	16.1415
NCP12	Atris	6564	21764	7063	990	2021	883	33	3	0		18	0.1	0	2.2	7.393
NCP12	Aalti	1944	5366	1487	3374	10899	2901	2269	7523	3558		3.8	5.8	9	7.4	54.228
NCP12	Aaegy	2995	6962	1345	3822	12273	3134	770	4553	3467		3.4	2	8.8	8	50.7617
NCP12	Aphil	4827	15688	4264	2686	7866	3624	74	234	58		10.8	0.2	0.1	9.2	29.8161
NCP12	Aconf	4805	13786	5626	2673	9899	2313	109	103	7		14.3	0.3	0	5.9	31.3191
NCP12	Atria	5590	15177	3795	1918	8415	4106	79	196	45		9.7	0.2	0.1	10.4	32.3415
NCP12	Asyri	5619	12974	3062	1886	10201	4708	82	613	176		7.8	0.2	0.4	12	39.4751
NCP12	Aaxis	4276	16193	5331	3311	7595	2615	0	0	0		13.6	0	0	6.7	25.9658
NCP12	Ceryt	2620	9975	2505	4907	13709	5418	60	104	23		6.4	0.2	0.1	13.8	48.9077
NCP12	Cgran	4880	15751	5287	2703	8033	2656	4	4	3		13.4	0	0	6.8	27.1941
NCP12	Ccana	712	4530	3262	5575	17078	4464	1300	2180	220		8.3	3.3	0.6	11.4	60.3291
NCP12	Cseta	2616	5307	1194	4390	17364	6525	581	1117	227		3	1.5	0.6	16.6	63.5945
NCP12	Csple	6489	22429	7683	1098	1359	263	0	0	0		19.5	0	0	0.7	4.12502
NCP12	Ecras	3402	9418	2772	4036	13897	5102	149	473	72		7	0.4	0.2	13	49.5206
NCP12	Fimmu	3719	13246	5281	3868	10542	2665	0	0	0		13.4	0	0	6.8	33.5877
NCP12	Gspil	5312	13608	2987	2274	10175	4959	1	5	0		7.6	0	0	12.6	38.5011
NCP12	Hseri	5534	15790	3720	1970	7751	4170	83	247	56		9.5	0.2	0.1	10.6	30.9453
NCP12	Hsosn	5625	14940	4436	1696	4357	2372	266	4491	1138		11.3	0.7	2.9	6	28.5344
NCP12	Hjava	270	471	50	7094	22890	7698	223	427	198		0.1	0.6	0.5	19.6	78.8764
NCP12	Lcune	4450	10214	1895	2794	12580	5642	343	994	409		4.8	0.9	1	14.3	48.8696
NCP12	Mcoyp	2546	7816	1423	3906	10109	2864	1135	5863	3659		3.6	2.9	9.3	7.3	47.9032
NCP12	Nnasu	3876	17852	6079	3711	5936	1867	0	0	0		15.5	0	0	4.7	19.8444
NCP12	Nproc	3318	7050	896	3937	13553	4956	332	3185	2094		2.3	0.8	5.3	12.6	55.1715
NCP12	Ozibe	1795	2412	181	5253	13822	2482	539	7554	5283		0.5	1.4	13.4	6.3	60.675
NCP12	Physt	6308	21212	7241	1279	2574	705	0	2	0		18.4	0	0	1.8	8.34414
NCP12	Pamer	2570	6669	1612	3690	11092	2605	1327	6027	3729		4.1	3.4	9.5	6.6	50.1615
NCP12	Pstra	3631	6466	1390	3942	17122	5981	14	200	575		3.5	0	1.5	15.2	59.2635
NCP12	Pclar	2718	10592	3758	2516	7769	2884	2353	5427	1304		9.6	6	3.3	7.3	40.8942
NCP12	Ploto	4414	9137	1868	3098	12315	2855	75	2336	3223		4.8	0.2	8.2	7.3	44.5207
NCP12	Pjuli	5210	19430	6746	2376	4357	1200	1	1	0		17.2	0	0	3.1	14.1349
NCP12	Pcafe	6805	23410	7883	782	378	63	0	0	0		20	0	0	0.2	1.12154
NCP12	Smole	4692	14272	2690	2804	9275	5140	91	241	116		6.8	0.2	0.3	13.1	37.2727
NCP12	Scaro	5100	14511	5297	1952	7333	2271	535	1944	378		13.5	1.4	1	5.8	29.3685
NCP12	Snige	3967	11643	5795	3022	10507	2009	598	1638	142		14.7	1.5	0.4	5.1	35.996
NCP12	Sgemi	3764	8981	1981	3823	14807	5965	0	0	0		5	0	0	15.2	52.8267
NCP12	Srich	37	124	0	7541	23655	7940	9	9	6		0	0	0	20.2	80.3744
NCP12	Tsibi	1781	3791	1054	5769	19827	6468	37	170	424		2.7	0.1	1.1	16.4	67.305
NCP12	Tsebi	4051	16381	5231	3308	7110	2683	228	297	32		13.3	0.6	0.1	6.8	25.6606
NCP12	Vmand	5133	12972	3972	2454	10816	3974	0	0	0		10.1	0	0	10.1	37.6135
NCP12	Wauro	2473	9109	1744	5114	14679	6202	0	0	0		4.4	0	0	15.8	53.1039
NCP13	Aconf	4490	14885	4203	2241	6315	2916	21	104	13		11.9	0.1	0	8.3	26.5289
NCP13	Avirg	6097	14185	4305	653	7104	2827	2	15	0		12.2	0	0	8	28.2653
NCP13	Ceryt	4385	9602	2647	2351	11591	4458	16	111	27		7.5	0	0.1	12.7	45.9247
NCP13	Ccana	1753	4268	2607	4184	15068	4301	815	1968	224		7.4	2.3	0.6	12.2	60.6371
NCP13	Corbi	6480	16761	5706	270	4500	1425	2	43	1		16.2	0	0	4	16.9603
NCP13	Cjuba	4375	5694	1217	2372	15215	5772	5	395	143		3.5	0	0.4	16.4	60.765
NCP13	Cpers	5452	8209	1163	1263	10171	4497	37	2924	1472		3.3	0.1	4.2	12.8	49.9943
NCP13	Ecras	4765	8686	3260	1940	12282	3781	47	336	91		9.3	0.1	0.3	10.7	46.604
NCP13	Ljapo	6397	19015	6538	346	2232	594	9	57	0		18.6	0	0	1.7	8.19313
NCP13	Mvimi	6110	10975	3040	623	10024	4056	19	305	36		8.6	0.1	0.1	11.5	40.8804
NCP13	Pperf	6260	15315	3873	491	5983	3257	1	6	2		11	0	0	9.3	26.276
NCP13	Pmont	5922	16234	6236	823	5053	896	7	17	0		17.7	0	0	2.5	16.9546
NCP13	Scaro	5927	13852	4430	808	7208	2269	17	244	433		12.6	0	1.2	6.4	27.6259
NCP13	Snige	4160	11145	5318	2274	8913	1718	318	1246	96		15.1	0.9	0.3	4.9	33.753
NCP16	Asali	5035	18784	7231	2803	4943	747	161	291	31		18.1	0.4	0.1	1.9	14.9428
NCP16	Atris	7277	22023	7315	722	1978	682	0	17	12		18.3	0	0	1.7	6.68815
NCP16	Aalti	460	6048	4537	3785	10091	2228	3754	7879	1244		11.3	9.4	3.1	5.6	50.4622
NCP16	Aaegy	1379	7522	4939	3783	11734	2667	2837	4762	403		12.3	7.1	1	6.7	47.8764
NCP16	Aphil	3991	16636	6358	3972	7199	1596	36	183	55		15.9	0.1	0.1	4	22.4304
NCP16	Aconf	3359	15346	7118	4568	8606	886	72	66	5		17.8	0.2	0	2.2	23.8795
NCP16	Amela	3486	15575	6513	3611	6853	1214	902	1590	282		16.3	2.3	0.7	3	24.1268
NCP16	Anebu	3573	14166	5845	4425	9750	2139	1	102	25		14.6	0	0.1	5.3	29.958
NCP16	Avirg	5596	16312	6350	2387	7702	1657	16	4	2		15.9	0	0	4.1	23.3923
NCP16	Atria	5645	14555	4348	2347	9291	3592	7	172	69		10.9	0	0.2	9	32.6163
NCP16	Asyri	3665	12550	6592	4165	10818	1337	169	650	80		16.5	0.4	0.2	3.3	31.9917
NCP16	Bhali	5736	19429	7142	2138	4302	836	125	287	31		17.8	0.3	0.1	2.1	13.5537
NCP16	Bpapy	1508	10304	5132	4954	10677	2348	1537	3037	529		12.8	3.8	1.3	5.9	40.1289
NCP16	Ccaro	1558	10867	6362	6412	13116	1647	29	35	0		15.9	0.1	0	4.1	36.971
NCP16	Ceryt	2153	10440	5045	5837	13522	2943	9	56	21		12.6	0	0.1	7.4	41.2757
NCP16	Cgran	6017	16269	6004	1982	7746	2005	0	3	0		15	0	0	5	24.3692
NCP16	Cargu	5488	21883	7887	2511	2135	122	0	0	0		19.7	0	0	0.3	5.63883
NCP16	Cjuba	2498	7105	3317	5468	16491	4495	33	422	197		8.3	0.1	0.5	11.2	53.4852
NCP16	Csell	1940	9266	4589	3379	9863	2381	2680	4889	1039		11.5	6.7	2.6	5.9	42.8047
NCP16	Csple	7148	22677	7684	851	1341	325	0	0	0		19.2	0	0	0.8	4.16229
NCP16	Ecras	1830	10885	5420	5975	12844	2537	194	289	52		13.5	0.5	0.1	6.3	39.1496
NCP16	Enutt	2829	9323	4912	3016	10375	2397	2154	4320	700		12.3	5.4	1.7	6	42.7022
NCP16	Fspp	2222	4353	3388	2497	8931	2262	3280	10734	2359		8.5	8.2	5.9	5.7	54.7819
NCP16	Fimmu	4190	13474	4479	3809	10544	3530	0	0	0		11.2	0	0	8.8	35.1621
NCP16	Flimo	3780	13376	5729	2926	7821	1826	1293	2821	454		14.3	3.2	1.1	4.6	31.1498
NCP16	Frust	3043	10204	3675	4956	13814	4334	0	0	0		9.2	0	0	10.8	45.3405
NCP16	Fhete	2934	12612	6702	5000	11335	1306	65	71	1		16.7	0.2	0	3.3	31.7594
NCP16	Gspil	3014	14793	6446	4985	9224	1560	0	1	3		16.1	0	0	3.9	26.945
NCP16	Hseri	5022	15413	6363	2976	8374	1539	1	231	107		15.9	0	0.3	3.8	25.3435
NCP16	Hmant	3958	7907	3158	1538	9373	3710	2503	6738	1141		7.9	6.3	2.9	9.3	49.5203
NCP16	Hpers	4500	10084	2550	3496	13454	5393	3	480	66		6.4	0	0.2	13.5	48.2861
NCP16	Hsosn	6224	13562	5947	1046	5920	1641	729	4536	421		14.9	1.8	1.1	4.1	30.2229
NCP16	Hjava	72	567	956	7886	23124	6907	41	327	146		2.4	0.1	0.4	17.3	75.8457
NCP16	Hscan	4311	18473	7552	3653	5512	457	35	33	0		18.9	0.1	0	1.1	14.9953
NCP16	Hranu	2086	13224	5797	4811	9584	2069	1102	1210	143		14.5	2.8	0.4	5.2	32.1366
NCP16	Iglan	2733	4741	2182	1627	5896	2850	3639	13381	2977		5.5	9.1	7.4	7.1	55.2816
NCP16	Kpoly	5049	13601	5388	2351	8712	1977	599	1705	644		13.5	1.5	1.6	4.9	30.9649
NCP16	Lmajo	4565	16514	5989	2550	6406	1814	884	1098	206		15	2.2	0.5	4.5	23.2799
NCP16	Lgibb	2686	12572	5715	3858	8307	1768	1455	3139	526		14.3	3.6	1.3	4.4	33.0135
NCP16	Lgran	3202	14757	6020	3681	6872	1680	1116	2389	309		15	2.8	0.8	4.2	27.3347
NCP16	Lpepl	1756	13825	6068	5574	8903	1771	669	1290	170		15.2	1.7	0.4	4.4	29.8906
NCP16	Ljapo	7323	21561	7202	674	2414	800	2	43	7		18	0	0	2	8.13721
NCP16	Mvimi	3727	13063	5551	4250	10642	2427	22	313	31		13.9	0.1	0.1	6.1	33.4333
NCP16	Mamer	1788	8383	4572	6095	15492	3433	116	143	4		11.4	0.3	0	8.6	47.639
NCP16	Mreev	6424	21114	6911	915	2245	983	660	659	115		17.3	1.6	0.3	2.5	9.71119
NCP16	Maqua	2959	12828	5238	3269	8139	2122	1771	3051	649		13.1	4.4	1.6	5.3	33.2584
NCP16	Mhete	2789	7441	2629	5049	16279	5359	161	298	21		6.6	0.4	0.1	13.4	54.8044
NCP16	Nnasu	6246	17605	5941	1753	6413	2068	0	0	0		14.8	0	0	5.2	21.1887
NCP16	Nproc	2638	6946	3635	4051	13684	3794	1310	3388	580		9.1	3.3	1.4	9.5	52.1311
NCP16	Ozibe	1159	2630	1854	3796	12511	5151	3044	8877	1004		4.6	7.6	2.5	12.9	66.3044
NCP16	Pleni	3647	7128	3734	3069	13021	3156	1283	3869	1119		9.3	3.2	2.8	7.9	50.0824
NCP16	Physt	6807	21808	7672	1192	2209	337	0	1	0		19.2	0	0	0.8	6.36336
NCP16	Pperf	4874	17166	7173	3124	6843	836	1	9	0		17.9	0	0	2.1	19.2075
NCP16	Pamer	888	6915	5051	4172	10438	1875	2939	6665	1083		12.6	7.3	2.7	4.7	47.4142
NCP16	Pstra	1318	7217	5228	6415	16393	2748	266	408	33		13.1	0.7	0.1	6.9	48.8408
NCP16	Pclar	2185	11788	5182	3172	7109	1865	2642	5121	962		12.9	6.6	2.4	4.7	35.2146
NCP16	Ploto	2117	9346	5707	4534	10760	2037	1348	3912	265		14.3	3.4	0.7	5.1	41.7454
NCP16	Pjuli	5719	20006	7436	2280	4012	573	0	0	0		18.6	0	0	1.4	11.4551
NCP16	Pparv	1511	8260	5912	4182	11057	1864	2306	4701	233		14.8	5.8	0.6	4.7	44.0264
NCP16	Pmont	5958	19474	6960	2040	4522	1049	1	22	0		17.4	0	0	2.6	13.9734
NCP16	Pcafe	7956	23118	7682	43	899	327	0	1	0		19.2	0	0	0.8	3.06551
NCP16	Smole	3709	14419	5873	4271	9378	2056	19	221	80		14.7	0	0.2	5.1	29.1186
NCP16	Scaro	4983	15574	6020	2326	7192	1354	690	1252	635		15	1.7	1.6	3.4	24.4791
NCP16	Snige	2803	13790	6515	4097	9200	1416	1099	1028	78		16.3	2.7	0.2	3.5	29.0911
NCP16	Sgemi	2975	8994	5174	5024	15024	2835	0	0	0		12.9	0	0	7.1	44.6185
NCP16	Srich	12	118	33	7986	23884	7972	1	16	4		0.1	0	0	19.9	79.6282
NCP16	Tsebi	4947	16295	6269	2842	7529	1705	210	194	35		15.7	0.5	0.1	4.3	23.5547
NCP16	Vmand	3407	14306	6237	4592	9712	1772	0	0	0		15.6	0	0	4.4	28.6914
NCP16	Vvelu	4344	14015	5089	2311	6117	1751	1344	3886	1169		12.7	3.4	2.9	4.4	29.3659
NCP16	Wauro	3865	7866	2722	4134	16152	5287	0	0	0		6.8	0	0	13.2	53.5627

## Sheet: Field description
Column header	Description
NCP	Nature's Contribution to People
	NCP1= Habitat creation and maintenance
	NCP6= Regulation of hazards and extreme events (floods)
	NCP7= Regulation of freshwater quality
	NCP8= Formation and proteccion of soils
	NCP12= Feed and food provision (crops)
	NCP13= Materials provision (timber)
	NCP16= Human experiences (outdoor recreation)
ID	4-letter identification of invasive species used in analyses. See Suppl Table 1 for the full name.
L1-H3	Categories of potential impact of invasive alien species on NCP. See figure for guidance
	Data indicates the area of Europe classified into each impact category.
