# Supplementary material for: Threats of invasive alien species to Nature’s Contribution to People
Source: Research Square preprint supplement (doi:10.21203/rs.3.rs-2599509/v1), 2023-02-20
Supplement: Supplementary file 4 [file f2a67bcdc8b12ae424c05f3d.xlsx]

## Sheet: IAS investigated
									Regulating NCP				Material NCP		Non-material NCP
Scientific name	ID	Synonyms	Common name	Origin	EC classification	Habitat	Type Risk Assessment	ES evaluation	1. Habitat creation and maintenance	7. Regulation of freshwater and coastal water quality	8. Formation, protection and decontamination of soils and sediments	9. Regulation of hazards and extreme events	12. Food and feed	13. Materials, companionship and labor	16. Physical and psycological experiences	Reference
Acacia saligna	Asali	Mimosa saligna, Acacia bracteata, Acacia cyanophylla, Acacia lindleyi, Racosperma salignum	Blue-leafed wattle	Australia (West)	Listed	Terrestrial plant	EPPO	High (moderate uncertainty)	1		1	1			1	Branquart et al 2018
Acridotheres cristatellus	Acris	Gracula cristatellus, Aethiopsar cristatellus	Crested myna	Asia (SE)	4th update - revision	Terrestrial vertebrate	EU	Moderate (high confidence)					1			Scalera et al 2020
Acridotheres tristis	Atris	Acridotheres tristas, Sturnus tristis	Common myna	Asia (Central)	Listed	Terrestrial vertebrate	EU	Major (high confidence)					1		1	Scalera et al 2017
Ailanthus altissima	Aalti	Ailanthus glandulosa, Ailanthus peregrina, Toxicodendron altissimum	Tree of heaven	Asia (China and Vietnam)	Listed	Terrestrial plant	EU	Moderate (high confidence)	1		1		1		1	Pergl 2018
Alopochen aegyptiaca	Aaegy	Alopochen aegyptiacus, Anas aegyptiaca	Egyptian goose	Africa	Listed	Terrestrial vertebrate	GB	Moderate (high confidence)		1			1		1	GB NNSS 2011
Alternanthera philoxeroides	Aphil	Achyranthes philoxeroides, Achyranthes paludosa, Alternanthera philoxerina, Bucholzia philoxeroides, Telanthera philoxeroides	Alligator-weed	South America	Listed	Freshwater plant	EPPO	High (low uncertainty)	1	1			1		1	Anderson et al 2015
Ambrosia confertiflora	Aconf	Ambrosia caudata, Ambrosia simulans, Franseria caudata, Franseria confertiflora, Franseria hispidissima, Franseria incana, Franseria pringlei, Franseria strigulosa, Franseria tenuifolia, Franseria tenuifolia var. tripinnatifida, Gaertneria tenuifolia, Gaertneria tenuifolia	Bur ragweed	North America	Proposed for listing	Terrestrial plant	EPPO	High (moderate uncertainty)	1				1	1	1	Dufour 2017
Ameiurus melas	Amela	Silurus melas, Ictalurus melas, Ictalurus melas melas	Black bullhead	North America	Proposed for listing	Freshwater vertebrate	EU	Minor (low confidence)	1	1			1		1	Aislabie et al. 2020
Ameiurus nebulosus	Anebu	Pimelodus nebulosus, Ictalurus nebulosus, Ictalurus nebulosus nebulosus	Brown bullhead	North America	Proposed for listing	Freshwater vertebrate	EU	Minimal (low confidence)	1	1			1		1	Aislabie et al 2020
Andropogon virginicus	Avirg	Holcus virginicus, Sorghum virginicum	Broom-sedge	North America	Listed	Terrestrial plant	EPPO	Moderate (moderate uncertainty)	1		1	1		1	1	Pescott 2017
Arthurdendyus triangulatus	Atria	Artioposthia triangulata, Geoplana triangulata	New Zealand flatworm	Australia (New Zealand)	Listed	Terrestrial invertebrate	EU	Major (medium confidence)	1		1		1		1	Murchie et al 2018
Asclepias syriaca	Asyri	Asclepias cornuti, Asclepias intermedia, Asclepias syriaca var. Kansana, Asclepias kansana	Common milkweed	North America	Listed	Terrestrial plant	EU	Moderate (medium confidence)	1				1		1	Tokarska-Guzik and Pisarczyk 2015
Axis axis	Aaxis	Cervus axis	Indian spotted deer	Asia (India)	Proposed for listing	Terrestrial vertebrate	EU	Moderate (low confidence)			1		1			Scalera et al 2021
Baccharis halimifolia	Bhali	Baccharis cuneifolia	Eastern baccharis	North America	Listed	Terrestrial plant	EPPO	Medium (high uncertainty)	1		1	1	1		1	EPPO 2013
Broussonetia papyrifera	Bpapy	Broussonetia billardii, Broussonetia cordata, Broussonetia dissecta, Broussonetia elegans, Broussonetia kasii, B. kazi, Broussonetia maculata, Broussonetia nana, Broussonetia navicularis, Broussonetia spathulata, Broussonetia tricolor, Broussonetia papyrifera var. Integrifolia, Morus papyrifera, Papyrius papyrifera, Smithiodendron artocarpoideum, Stenochasma ancolanum, Streblus cordatus, Trophis …	Paper mulberry	Asia (East and SE)	4th update - revision	Terrestrial plant	EU	Minimal (low confidence)	1		1	1			1	Kudrnovsky et al 2020
Cabomba caroliniana	Ccaro		Carolina Water-shield	South America	Listed	Freshwater plant	EPPO	Moderate (medium confidence)	1	1					1	Rotteveel 2007
Callosciurus erythraeus	Ceryt		Pallas's squirrel	Asia (SE)	Listed	Terrestrial vertebrate	GB	Moderate (medium confidence)					1	1	1	Mazzamuto et al 2014
Cardiospermum grandiflorum	Cgran	Cardiospermum barbicaule Baker, Cardiospermum coluteoides Kunth, Cardiospermum duarteanum Cambess., Cardiospermum elegans Kunth, Cardiospermum grandiflorum f. elegans, Cardiospermum grandiflorum f. hirsutum, Cardiospermum grandiflorum var. hirsutum, Cardiospermum hirsutum, Cardiospermum hispidum, Cardiospermum inflatum, Cardiospermum macrophyllum, Cardiospermum pilosum, Cardiospermum velutinum, C…	Balloon vine	South America	Listed	Terrestrial plant	EPPO	Moderate (moderate uncertainty)	1		1		1		1	EPPO 2017
Castor canadensis	Ccana	Castor subauratus, Castor caecator	North American beaver	North America	Proposed for listing	Terrestrial vertebrate	ISEIA/Harmonia	Moderate (low confidence)	1	1		1	1	1		Hollander et al. 2017. Risk assessment of the alien North American beaver (Castor canadensis)
Celastrus orbiculatus	Corbi	Celastrus articulatus , Celastrus insularis , Celastrus jeholensis , Celastrus lancifolia , Celastrus stephanotiifolius , Celastrus strigillosus , Celastrus tatarinowii, Celastrus versicolor Nakai	Asian bittersweet, staff wine	Asia (East)	Proposed for listing	Terrestrial plant	ISEIA/Harmonia	High (medium confidence)	1		1			1		Beringen et al 2017
Cenchrus setaceum	Cseta	Pennisetum setaceum	Crimson fountaingrass	Africa (North)	Listed	Terrestrial plant	GB	Major (high confidence)	1		1	1	1			Deputy Direction of Nature 2015
Channa argus	Cargu	Channa argus kimurai, Ophicephalus argus, Ophicephalus nigricans, Ophicephalus pekinensis, Ophiocephalus argus, Ophiocephalus argus warpachowskii	Northern snakehead	Asia	Proposed for listing	Freshwater vertebrate	EU	Moderate (medium confidence)					1		1	Aislabie et al 2019
Cortaderia jubata	Cjuba	Cortaderia atacamensis, Cortaderia selloana subsp. jubata, Gynerium jubatum Lemoine, Gynerium pygmaeum, Gynerium quila var. pygmaeum	Purple pampas grass	South America	Listed	Terrestrial plant	EPPO	Moderate (high uncertainty)				1		1	1	Bouhache et al 2018
Cortaderia selloana	Csell	Arundo dioeca, Arundo selloana , Gynerium argenteum, Moorea argentea, Cortaderia argentea, Cortaderia dioeca	Pampas grass	South America	4th update - revision	Terrestrial plant	EU	Moderate (Medium confidence)	1	1	1	1			1	Brundu et al 2020
Corvus splendens	Csple		house crow	Asia (India)	Listed	Terrestrial vertebrate	GB	Minor (medium uncertainty)					1		1	Parrott 2011
Cydalima perspectalis	Cpers	Diaphania perspectalis, Glyphodes perspectalis, Palpita perspectalis	Box tree moth	Asia (India)	Proposed for listing	Terrestrial invertebrate	EU	Major (medium confidence)	1		1	1		1		Kenis and Rabitsch 2018
Ehrharta calycina	Ecaly	Aira capensis, Ehrharta adscendens, Ehrharta auriculata, Ehrharta geniculata, Ehrharta laxiflora, Ehrharta laxifolia, Ehrharta melicoides, Ehrharta nutans, Ehrharta ovata, Ehrharta paniculata, Ehrharta pilosa, Ehrharta ramosa, Ehrharta stricta, Ehrharta undulata, Ehrharta versicolor, Melica geniculata, Trochera auriculata, Trochera calycina, Trochera geniculata, Trochera laxiflora, Trochera melic…	Perennial veldtgrass	South Africa	Listed	Terrestrial plant	EPPO	High (moderate uncertainty)	1		1	1				EPPO 2018
Eichhornia crassipes	Ecras		Water hyacinth	South America	Listed	Freshwater plant	EPPO	Major (low uncertainty)	1	1	1	1	1	1	1	EPPO 2018
Elodea nuttallii	Enutt	Anacharis occidentalis, Anacharis nuttallii, Elodea columbiana, Elodea minor, Anacharis occidentalis, Serpicula occidentalis, Elodea canadensis var. Angustifolia	Nuttall’s pondweed	North America	Listed	Freshwater plant	EU	Moderate (Medium confidence)	1	1		1	1		1	Caffrey and O'Flynn 2014
Fallopia spp.	Fspp	Fallopia japonica, Fallopia x bohemica, Fallopia sachalinensis, Persicaria wallichii	Japanese Knotweed	Asia	4th update - revision	Terrestrial plant	ISEIA/Harmonia	Moderate (Medium confidence)	1		1				1	Beringen et al 2019
Faxonius immunis	Fimmu	Orconectes immunis, Cambarus immunis, Cambarus signifer	Calico crayfish	North America	4th update - revision	Freshwater invertebrate	EU	Major (medium confidence)		1	1		1		1	Tricarico and Lucy 2020
Faxonius limosus	Flimo		Spinycheek crayfish	North America	Listed	Freshwater invertebrate	GB	Moderate (medium uncertainty)	1		1	1	1		1	GB NNSS 2011
Faxonius rusticus	Frust	Orconectes rusticus, Cambarus rusticus	Rusty crayfish	North America	Proposed for listing	Freshwater invertebrate	EU	Major (high confidence)	1		1				1	Stebbing and Tricarico 2017
Faxonius virilis	Fviri		Virile crayfish	North America	Listed	Freshwater invertebrate	GB	Major (High confidence)								Rogers and Watson 2013
Fundulus heteroclitus	Fhete	Cobitis heteroclita Linnaeus, Fundulus heteroclitus macrolepidotus	Mummichog	North America	Listed	Freshwater vertebrate	EU	Minor (medium confidence)					1		1	Alcaraz-Hernández and García-Berthou
Gambusia affinis	Gaffi		Western mosquitofish	North America	Proposed for listing	Freshwater vertebrate	EU	Major (medium confidence)		1						Aislabie et al 2020
Gunnera tinctoria	Gtinc	Gunnera chilensis, Gunnera scabra, Panke tinctoria, Gunnera pilosa	Giant rhubarb	South America	Listed	Terrestrial plant	EU	Moderate (Low confidence)	1		1					O'Rourke and O'Flynn 2016
Gymnocoronis spilanthoides	Gspil	Alomia spilanthoides, Alomia spilanthoides, Gymnocoronis attenuata, Gymnocoronis spilanthoides var. attenuata, Gymnocoronis subcordata, Piqueria attenuata, Piqueria subcordata	Senegal tea	South America	Listed	Freshwater plant	EPPO	Moderate (high uncertainty)	1	1			1		1	EPPO 2017
Hakea sericea	Hseri	Hakea acicularis, Hakea tenuifolia	Bushy needlewood	Australia (SE)	Proposed for listing	Terrestrial plant	EPPO	Moderate (Moderate uncertainty)	1		1	1	1		1	EPPO 2018
Heracleum mantegazzianum	Hmant		Giant hogweed	Russia	Listed	Terrestrial plant	GB	Moderate (Medium confidence)	1		1				1	Pergl and Branqart 2016
Heracleum persicum	Hpers		Persian hogweed	East Europe	Listed	Terrestrial plant	EPPO	Low (medium uncertainty)	1		1				1	EPPO 2009
Heracleum sosnowskyi	Hsosn		Sosnowsky's hogweed	Russia	Listed	Terrestrial plant	EPPO	Minimal (medium uncertainty)	1		1		1		1	EPPO 2009
Herpestes javanicus	Hjava	Herpestes palustris	Javan mongoose	Asia	Listed	Terrestrial vertebrate	EU	Massive (high confidence)					1		1	DDN 2015
Humulus scandens	Hscan	Antidesma scandens, Humulus japonicus, Humulus japonicus var. variegatus	Japanese hop	Asia	Listed	Terrestrial plant	EPPO	Moderate (Moderate uncertainty)	1		1	1			1	EPPO 2018
Hydrocotyle ranunculoides	Hranu	Hydrocotyle vulgaris, Hydrocotyle leucocephala, Hydrocotyle natans	Floating pennywort	North America	Listed	Freshwater plant	EPPO	High (low uncertainty)	1	1		1			1	EPPO 2009
Impatiens glandulifera	Iglan	Impatiens glanduligera, Impatiens roylei	Himalayan balsam	Asia	Listed	Terrestrial plant	EU	Moderate (Medium confidence)	1		1				1	Pisarczyk and Tokarska-Guzik 2015
Koenigia polystachya	Kpoly	Aconogonon polystachyum, Peutalis polystachya, Persicaria polystachya, Persicaria wallichii, Polygonum polystachyum, Reynoutria polystachya, Rubrivena polystachya	Himalayan knotweed	Asia	Proposed for listing	Terrestrial plant	EU	Moderate (Medium confidence)	1	1	1				1	Tanner and Branquart 2018
Lagarosiphon major	Lmajo		African elodea	Africa (South)	Listed	Freshwater plant	GB	Minor (low uncertainty)		1	1				1	GB NNSS 2011
Lampropeltis getula	Lgetu	Coluber getulus, Lampropeltis getulus, Herpetodryas getulus, Ophibolus getulus, Ophibolus boylii, Coronella Getulus, Coronella getulus var. pseudogetulus, Ophibolus getulus, Ophibolus getulus, Ophilobus getulus, Triaeniopholis arenarius, Triaenopholis arenarius, Lampropeltis getulus goini, Lampropeltis getulus brooksi, Lampropeltis getula getula, Lampropeltis getula meansi, Lampropeltis getula me…	eastern kingsnake	North America	Proposed for listing	Terrestrial vertebrate	EU	Minor (low confidence)								Verzelen 2017
Lepomis gibbosus	Lgibb		Pumpkinseed	North America	Listed	Freshwater vertebrate	EU	Moderate (Medium confidence)	1	1			1		1	Deputy Direction of Nature 2018
Lespedeza cuneata	Lcune	Lespedeza juncea var. sericea, Lespedeza sericea, Lespedeza juncea subsp. sericea, Anthyllis cuneata, Aspalathus cuneata, Hedysarum sericeum, Lespedeza argyraea, Lespedeza juncea var. sericea, Lespedeza sericea var. latifolia	Chinese bushclover	Asia and Australia	Listed	Terrestrial plant	EPPO	Moderate (High uncertainty)	1		1		1			EPPO 2018
Limnoperna fortunei	Lfort	Dreissena siamensis, Limnoperna depressa, Limnoperna lemeslei, Limnoperna supoti, Volsella fortunei, Modiola cambodjensis, Modiola lacustris, Mytilus martensi, Limnoperna coreana	Golden mussel	Asia	Proposed for listing	Freshwater invertebrate	EU	Major (low confidence)	1	1						Lucy and Tricharico 2020
Lithobates catesbeianus	Lcate	Rana catesbeiana	American bullfrog	North America	Listed	Freshwater vertebrate	GB	Major (low uncertainty)		1						GB NNSS 2011
Ludwigia grandiflora	Lgran		Largeflower primrose-willow	South America	Listed	Freshwater plant	EPPO	Major (low uncertainty)	1	1		1	1	1	1	EPPO 2011
Ludwigia peploides	Lpepl		Water primrose	South America	Listed	Freshwater plant	EPPO	Major (low uncertainty)	1	1			1	1	1	EPPO 2011
Lygodium japonicum	Ljapo	Ophioglossum japonicum, Adiantum scandens	Vine-like fern	Asia (SE)	Listed	Terrestrial plant	EPPO	High (moderate uncertainty)	1			1		1	1	EPPO 2018
Lysichiton americanus	Lamer	Lysichiton camtschatcensis	Yellow skunk cabbage	North America	Listed	Terrestrial plant	EPPO	Low (low uncertainty)	1							EPPO 2009
Microstegium vimineum	Mvimi		Japanese stiltgrass	Asia	Listed	Terrestrial plant	EPPO	Medium (low uncertainty)	1		1	1		1	1	EPPO 2015
Misgurnus anguillicaudatus	Mangu	Cobitis anguillicaudata, Misgurnus anguillicaudatus anguillicaudatus, Misgurnus fossilis anguillicaudatus, Misgurnus aguillicadatus, Nemachilus lividus, Misgurnus lividus, Nemacheilus lividus, Misgurnus crossochilus, Ussuria leptocephala, Misgurnus mizolepis grangeri, Misgurnus mohoity leopardus, Misgurnus mohoity yunnan, Misgurnus punctatus, Misgurnus mizolepis punctatus, Misgurnus mizolepis uni…	Oriental Weatherfish	Asia (East)	4th update - revision	Freshwater vertebrate	EU	Minor (low confidence)		1						Verreycken 2021
Morone americana	Mamer	Perca americana	White perch	North America	Proposed for listing	Freshwater vertebrate	EU	Minor (low confidence)							1	Aislabie et al 2018
Muntiacus reevesi	Mreev		Chinese muntjac	Asia	Listed	Terrestrial vertebrate	GB	Minor (medium uncertainty)							1	GB NNSS 2011
Myocastor coypus	Mcoyp		Coypu	South America	Listed	Terrestrial vertebrate	GB	Major (high confidence)	1		1	1	1			Bertolino 2014
Myriophyllum aquaticum	Maqua	Myriophyllum brasiliense, Myriophyllum proserpinacoides	Brazilian water-milfoil	South America	Listed	Freshwater plant	GB	Major (medium uncertainty)	1	1			1		1	GB NNSS 2011
Myriophyllum heterophyllum	Mhete		Twoleaf watermilfoil	North America	Listed	Freshwater plant	EPPO	Moderate (Moderate uncertainty)	1	1		1			1	EPPO 2015
Nasua nasua	Nnasu		South American coati	South America	Listed	Terrestrial vertebrate	GB	Moderate (low confidence)			1		1		1	Deputy Direction of Nature 2015
Nyctereutes procyonoides	Nproc		Raccoon dog	Asia	Listed	Terrestrial vertebrate	GB	Minor (low confidence)					1		1	Deputy Direction of Nature 2015
Ondatra zibethicus	Ozibe	Ondatra zibethica, Castor zibethicus, Fiber zibethicus, Myocastor zibethicus, Ondatra americana, Mus zibethicus	Muskrat	North America	Listed	Freshwater vertebrate	GB	Major (High confidence)	1	1	1	1	1		1	Deputy Direction of Nature 2016
Oxyura jamaicensis	Ojama		Ruddy duck	North America	Listed	Terrestrial vertebrate	GB	Minimal (high confidence)								Henderson 2014
Pacifastacus leniusculus	Pleni		Signal crayfish	North America	Listed	Freshwater invertebrate	GB	Major (low uncertainty)	1		1				1	GB nonnative species 2011
Parthenium hysterophorus	Physt		Santa Maria feverfew	North America	Listed	Terrestrial plant	EPPO	Major (medium uncertainty)	1		1		1		1	EPPO 2013
Percottus glenii	Pglen	Perccottus glehni, Eleotris dybowskii, Eleotris pleskei	Chinese sleeper	Asia	Listed	Freshwater vertebrate	Other	Medium (medium confidence)		1			1			Verreycken 2015
Persicaria perfoliata	Pperf	Polygonum perfoliatum	Mile-a-minute	Russia	Listed	Terrestrial plant	EPPO	Major (medium uncertainty)	1					1	1	EPPO 2006
Phytolacca americana	Pamer	Phytolacca americana var. americana, Phytolacca decandra	American pokeweed	North America	Proposed for listing	Terrestrial plant	EU	Moderate (Medium confidence)	1		1		1		1	Tanner and Fried 2020
Pistia stratiotes	Pstra	Pistia spathulata, Pistia stratiotes var. cuneata, Pistia stratiotes var. linguiformis, Pistia stratiotes var. obcordata, Pistia stratiotes var. spathulata, Zala asiatica, Apiospermum obcordatum, Limnonesis commutata, Limnonesis friedrichsthaliana, Pistia aegyptiaca, Pistia aethiopica, Pistia africana, Pistia amazonica, Pistia brasiliensis, Pistia commutata, Pistia crispata, Pistia cumingii, Pist…	Water cabbage	South America	Proposed for listing	Freshwater plant	EPPO	High (high confidence)	1	1	1		1		1	EPPO 2017
Platydemus manokwari	Pmano	Platydemus joliveti	New Guinea flatworm	Australia (New Guinea)	4th update - revision	Terrestrial invertebrate	EU	Major (medium confidence)			1		1			Murchie and Beckmann 2020
Procambarus clarkii	Pclar		Red swamp crayfish	North America	Listed	Freshwater invertebrate	GB	Major (low uncertainty)	1	1		1	1		1	GB NNSS 2011
Procyon lotor	Ploto		Raccoon	North America	Listed	Terrestrial vertebrate	GB	Moderate (Medium confidence)					1		1	Zalewski 2011
Prosopis juliflora	Pjuli	Acacia cumanensis, Acacia juliflora, Acacia salinarum, Algarobia juliflora, Algarobia juliflora, Desmanthus salinarum, Mimosa juliflora, Mimosa piliflora, Mimosa salinarum, Neltuma bakeri, Neltuma juliflora, Neltuma occidenatlis, Neltuma pallescens, Prosopis bracteolata, Prosopis cumanensis, Prosopis domingensis, Prosopis dulcis var. domingensis, Prosopis vidaliana	Long-thorn kiawe, mesquite	South America (Central)	Listed	Terrestrial plant	EPPO	High (Low uncertainty)	1		1		1		1	EPPO 2018
Pseudorasbora parva	Pparv		Topmouth gudgeon	Asia	Listed	Freshwater vertebrate	GB	Major (low uncertainty)					1		1	GB NNSS 2011
Pueraria lobata	Pmont	Dioclea odorata, Dolichos hirsutus, Dolichos japonica, Dolichos lobatus, Dolichos trilobus, Neustanthus chinensis, Pachyrhizus thunbergianus, Phaseolus trilobus, Pueraria argyi, Pueraria bodinieri, Pueraria caerulea, Pueraria harmsi, Pueraria hirsuta, Pueraria koten, Pueraria lobata var. lobata, Pueraria neo-caledonica, Pueraria novo-guineensis, Pueraria pseudo-hirsuta, Pueraria thunbergiana, Pue…	East Asian arrowroot	Asia	Listed	Terrestrial plant	EPPO	Major (Low Confidence)	1		1			1	1	EPPO 2006
Pycnonotus cafer	Pcafe		Red-vented bulbul	Asia (India)	Proposed for listing	Terrestrial vertebrate	EU	Moderate (Medium confidence)					1		1	Verzelen et al 2019
Salvinia molesta	Smole	Salvinia auriculata, Salvinia adnata	Giant salvinia	South America	Listed	Freshwater plant	EPPO	High (moderate uncertainty)	1	1	1	1	1		1	EPPO 2017
Sciurus carolinensis	Scaro		Eastern gray squirrel	North America	Listed	Terrestrial vertebrate	GB	Moderate (high confidence)					1	1	1	Bertolino et al 2014
Sciurus niger	Snige		Fox squirrel	North America	Listed	Terrestrial vertebrate	ISEIA/Harmonia	Medium (Medium confidence)	1				1	1	1	Baiwy et al 2015
Solenopsis geminata	Sgemi	Solenopsis geminata rufa, Atta geminata	Fire ant	South America	Proposed for listing	Terrestrial invertebrate	EU	Moderate (Medium confidence)					1		1	Blight 2018
Solenopsis ritchteri	Srich	Solenopsis saevissima var. oblongiceps, Solenopsis pylades var. tricuspis, Solenopsis saevissima st. richteri, Solenopsis saevissima var. tricuspis	Fire ant	South America	Proposed for listing	Terrestrial invertebrate	EU	Moderate (Low confidence)			1		1		1	Blight 2020
Tamias sibiricus	Tsibi	Eutamias sibiricus	Siberian chipmunk	Russia	Listed	Terrestrial vertebrate	GB	Moderate (high uncertainty)					1			GB NNSS 2011
Threskiornis aethiopicus	Taeth	Tantalus aethiopicus, Threskiornis aethiopica	African sacred ibis	Africa	Listed	Terrestrial vertebrate	GB	Minor (medium uncertainty)					1			Wright 2011
Trachemys scripta	Tscri	Chrysemys scripta, Chrysemys scripta var. elegans, Emys elegans, Emys holbrooki, Emys sanguinolenta, Pseudemys scripta, Pseudemys scripta elegans, Testudo scripta, Trachemys lineata	Pond slider	North America	Listed	Terrestrial vertebrate	EU	Moderate (Low confidence)		1	1					Deputy Direction of Nature 2015
Triadica sebifera	Tsebi	Carumbium sebiferum Croton sebiferum Excoecaria sebifera Sapium chihsinianum Sapium pleiocarpum Sapium sebiferum Sapium sebiferum, Seborium chinense Seborium sebiferum Stillingfleetia sebifera Stillingia sebifera Stillingia sinensis Triadica sinensis	Chinese tallow	Asia	Listed	Terrestrial plant	EPPO	High (low uncertainty)	1	1	1	1	1		1	EPPO 2018
Vespa mandarina	Vmand	Vespa japonica, Vespa latilineata, Vespa magnifica, Vespa sonani	Asian Giant Hornet	Asia	4th update - revision	Terrestrial invertebrate	EU	Massive (medium confidence)					1		1	Kenis and Seehausen 2021
Vespa velutina	Vvelu	Vespa auraria Smith, 1852 Vespa crabro var. immaculata Morawitz, 1889 Vespa flavitarsa Sonan, 1929 Vespa fruhstorferi Stadelmann, 1894 Vespa mongolica var. divergens Pérez, 1910	Asian Hornet	Asia	Listed	Terrestrial invertebrate	GB	Moderate (medium uncertainty)					1		1	Marris et al 2011
Wasmannia auropunctata	Wauro	Wasmannia atomum, Wasmannia australis, Wasmannia glabra, Wasmannia laevifrons, Wasmannia nigricans, Wasmannia obscura, Wasmannia panamana, Wasmannia pulla, Wasmannia rugosa, Wasmannia sulcaticeps weiseri	Electric ant	South America	Proposed for listing	Terrestrial invertebrate	EU	Major (medium confidence)					1		1	Blight 2020
Xenopus laevis	Xlaev	Bufo laevis Daudin, 1802 · Dactylethera boiei (Wagler, 1827) · Dactylethra bufonia (Merrem, 1820) · Dactylethra capensis Cuvier, 1830 · Dactylethra delalandii Cuvier, 1849 · Dactylethra laevis (Daudin, 1802) · Engystoma laevis (Daudin, 1802) · Leptopus boiei (Wagler, 1827)Pipa laevis (Daudin, 1802) · Tremeropugus typicus Smith, 1831 · Xenopus boiei Wagler, 1827 · X. laevis ssp. bunyoniensis Lover…	African clawed frog	Africa	Proposed for listing	Freshwater vertebrate	EU	Moderate (High confidence)		1						Scalera et al 2018

## Sheet: Field description
Column header	Description
Scientific name	Scientific name of the species
ID	4-letter identification of invasive species used in analyses
Synonyms	Accepted synonyms
Common name	English name of the species
Origin	Continent of origin
EC classification	Listed - These species have been assessed to be compliant with all criteria in Article 4(3), with due consideration to the elements provided for in Article 4(6), after consultation of the Member States in the Committee established under Article 27 of the Regulation.
	Not Listed- For these species there was insufficient evidence to determine their compliance with all criteria in Article 4(3), with due consideration to the elements provided for in Article 4(6), after consultation of the Member States in the Committee established under Article 27 of the Regulation.
	Proposed for listing- These species are under assessment for their compliance with all criteria in Article 4(3), with due consideration to the elements provided for in Article 4(6), after consultation of the Member States in the Committee established under Article 27 of the Regulation.
	4th update- These risk assessments are under assessment for their compliance with the requirements under Regulation 1143/2014, Article 5(1). The consultation of the Scientific Forum, established under Article 28 of the Regulation and made up of representatives of the scientific community appointed by the Member States , is ongoing.
Habitat	Terrestrial plant
	Terrestrial vertebrate
	Terrestrial invertebrate
	Aquatic plant
	Aquatic vertebrate
	Aquatic invertebrate
Type Risk Assessment	EPPO - Pest Risk Analysis of the European Plant Protection Organization
	EU - Official template of the European Commission. Based on the GB assessment but incorporating suggestions by Roy et al. (2018)
	GB - Risk assessment of the Great Britain Nonnative Species Secretariat
	ISEIA/Harmonia+ - Risk Assessment of the Belgium Forum on Invasive Species
	Other- Other risk assessments
ES evaluation	Result of the overall evaluation of impacts on ecosystem services, from minimal to massive. Uncertainty/confidence in brackets, from low to high.
1. Habitat creation and maintenance	Impacts on 18 NCP are coded as 1 (yes according to evidence in the report) or null (not mentioned).
7. Regulation of freshwater and coastal water quality
8. Formation, protection and decontamination of soils and sediments
9. Regulation of hazards and extreme events
12. Food and feed
13. Materials, companionship and labor
16. Physical and psycological experiences
Reference	Full reference of the report
